# Supplementary material
Source: MDPI journal article supplement (https://www.mdpi.com/2410-3888/7/6/317)
Supplement: s1 [file s1]

# Supplementary Materials

Table S1. Best fit partitions and substitution models.

|      |                                   |       | Set Partition (Conducted<br>by PartitionFinder 2) | Best Model for BI (Selected<br>by PartitionFinder 2) | Best Model for ML<br>(Selected by ModelFinder) |
|------|-----------------------------------|-------|---------------------------------------------------|------------------------------------------------------|------------------------------------------------|
| Best | Partition CDS<br>(BIC= 262977.02) | genes | <i>Atp6</i> 1th                                   | TRN+G                                                | TN+F+G4:                                       |
|      |                                   |       | <i>Atp6</i> 2th                                   | HKY                                                  | TPM3u+F+G4                                     |
|      |                                   |       | <i>Atp6</i> 3th                                   | TRN+G                                                | TN+F+G4                                        |
|      |                                   |       | <i>Cox1-2-3</i> 1th                               | TRN+G                                                | TIM2+F+G4                                      |
|      |                                   |       | <i>Cox1-2-3</i> 2th                               | GTR+G                                                | GTR+F+G4                                       |
|      |                                   |       | <i>Cox1-2-3</i> 3th                               | TRN+I+G                                              | TIM+F+G4                                       |
|      |                                   |       | <i>Cytb</i> 1th                                   | TRN+G                                                | TN+F+G4                                        |
|      |                                   |       | <i>Cytb</i> 2th                                   | TVM+G                                                | TVM+F+G4                                       |
|      |                                   |       | <i>Cytb</i> 3th                                   | TRN+I+G                                              | TN+F+G4                                        |
|      |                                   |       | <i>Nad1-2-3-4-4L-5-6</i> 1th                      | GTR+I+G                                              | TIM2+F+I+G4                                    |
|      |                                   |       | <i>Nad1-2-3-4-4L-5-6</i> 2th                      | TVM+G                                                | TVM+F+G4                                       |
|      |                                   |       | <i>Nad1-2-3-4-4L-5-6</i> 3th                      | TRN+I+G                                              | TN+F+G4                                        |
